# Supplementary material for: Dietary fish oil supplement induces age-specific contractile and proteomic responses in muscles of male rats
Source: PubMed Central journal article supplement (PMC7350698; doi:10.1186/s12944-020-01333-4), 2020-07-09
Supplement: 12944_2020_1333_MOESM1_ESM.pdf [file 12944_2020_1333_MOESM1_ESM.pdf]

| <b>Protein</b>                   | <b>Score</b> | <b>Coverage</b> | <b>Description</b>               | <b>MW</b> | <b>pl</b> | <b>Accession</b> | <b>KOG Group</b> |
|----------------------------------|--------------|-----------------|----------------------------------|-----------|-----------|------------------|------------------|
| 78kDa glucose related protein    | 606.6        | 55.96           | HSP70 chaperone family           | 72.3      | 5.16      | P06761           | O                |
| Actin, alpha muscle              | 466.4        | 53.32           | Cell motility protein            | 42        | 5.39      | P68035           | Z                |
| NADH dehydrogenase               | 285.2        | 43.95           | Mitochondrial ETC                | 27.4      | 6.68      | P19234           | C                |
| Peroxiredoxin                    | 482.8        | 61.11           | Eliminates peroxides             | 21.8      | 5.59      | P35704           | O                |
| Fatty acid binding protein       | 423.1        | 84.21           | Transprt of fatty acid           | 14.8      | 6.33      | P07483           | I                |
| Cystatin-B                       | 76.01        | 55.1            | Thiol proteinase inhibitor       | 11.2      | 6.3       | P01041           | U                |
| Isocitrate dehydrogenase         | 654.7        | 39.34           | CAC Step 3, NAD+ reducer         | 39.6      | 6.92      | Q99NA5           | C                |
| Serum albumin                    | 2735         | 73.36           | Regulates blood lipid content    | 68.7      | 6.48      | P02770           | I                |
| T-complex protein 1, subunit B   | 600          | 60.19           | Folds protein, ATP hydrolysis    | 57.4      | 6.46      | Q5XIM9           | O                |
| Selenium-binding protein 1       | 249.6        | 56.36           | Intra-Golgi protein transport    | 52.5      | 6.57      | Q8VIF7           | P                |
| Beta-enolase                     | 2575         | 76.5            | Glycolysis, muscle development   | 47        | 7.44      | P15429           | G                |
| Triosephosphate isomerase        | 2510         | 93.98           | Glycolysis, muscle development   | 26.8      | 7.24      | P48500           | G                |
| Parvalbumin alpha                | 832.7        | 73.64           | Relaxation after contraction     | 11.9      | 5.19      | P02625           | Z                |
| eIF-5A1                          | 100.4        | 50              | Muscle stem cell differentiation | 16.8      | 5.24      | Q3T1J1           | T                |
| Glycerol-3-phosphate phosphatase | 492.1        | 38.63           | Lipid biosynthesis               | 34.6      | 5.35      | D3ZDK7           | I                |
| ATP synthase subunit d           | 1317         | 91.93           | Mitochondrial ATP synthase       | 18.8      | 6.6       | P31399           | C                |

|                                     |       |       |                                |      |      |        |   |
|-------------------------------------|-------|-------|--------------------------------|------|------|--------|---|
| Histidine triad nucleotide BP1      | 205.3 | 47.62 | tRNA metabolism                | 13.8 | 6.87 | P62959 | T |
| Pyruvate kinase PKM                 | 485   | 62.15 | ATP synthesis                  | 57.8 | 7.06 | P11980 | G |
| Stress-induced-phosphoprotein 1     | 425.5 | 55.8  | HSP 70/90 organizing protein   | 62.5 | 6.8  | O35814 | O |
| Dihydrolipoyl dehydrogenase         | 1094  | 55.6  | Mitochondrial lipid metabolism | 54   | 7.87 | Q6P6R2 | C |
| DJ1                                 | 571   | 77.78 | Deglycase                      | 20   | 6.3  | Q00LX0 | V |
| Creatin Kinase muscle isoform       | 4697  | 70.87 | Creatine energy metabolism     | 43   | 7.06 | P00564 | C |
| Carbonic anhydrase 3 muscle isoform | 569.4 | 58.46 | Carbon dioxide hydration       | 29.4 | 7.37 | P14141 | R |
| Cofilin 2                           | 917.9 | 74.7  | Actin filament regulator       | 18.7 | 7.88 | M0RC65 | Z |
